# Supplementary material for: Structural and optical properties of langbeinite-related red-emitting K2Sc2(MoO4)(PO4)2:Eu phosphors
Source: Royal Society of Chemistry journal article supplement (doi:10.1039/d0ra04975a), 2020-01-01
Supplement: d0ra04975a1.pdf [file d0ra04975a1.pdf]

*STRUCTURAL AND OPTICAL PROPERTIES OF LANGBEINITE-RELATED  
RED-EMITTING  $K_2Sc_2(MoO_4)(PO_4)_2:Eu$  PHOSPHORS*

*Kateryna V. Terebilenko<sup>a,\*</sup>, Serhii G. Nedilko<sup>a</sup>, Vitalii P. Chornii<sup>a,b</sup>, Vadym M. Prokopets<sup>a</sup>, Mykola S. Slobodyanik<sup>a</sup>, Volodymyr V. Boyko<sup>b</sup>*

*a. Taras Shevchenko National University of Kyiv, Kyiv 01601, Ukraine*

*b. National University of Life and Environmental Sciences of Ukraine, Kyiv, 03041, Ukraine*

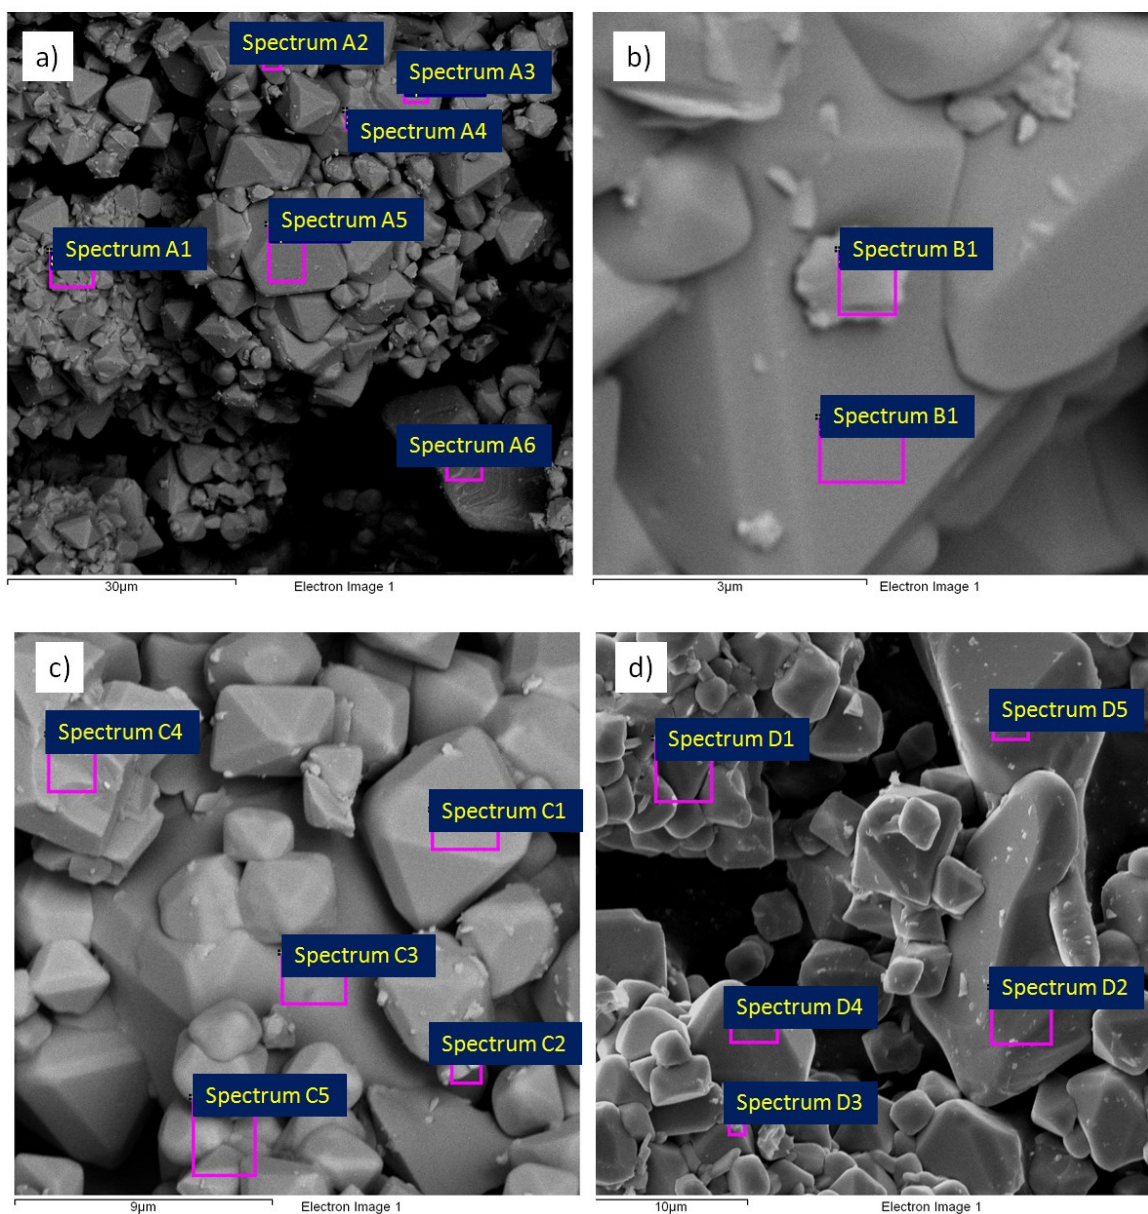

**Fig. S1 SEM-EDS analysis of samples  $K_2Sc_2(MoO_4)(PO_4)_2:xEu$  powders;  $x = 0.1$  (a)  $0.6$ (b);  $0.8$ (c);  $1.0$  mol % (d), and areas where EDS analysis has been performed**

**Table S1.** The EDS data for  $K_2Sc_2(MoO_4)(PO_4)_2 \cdot xEu$  powders;  $x = 0.1$   
Solid Solutions (Phase 1 corresponds to  $K_2Sc_2(MoO_4)(PO_4)_2$ , Phase 2- to  
 $ScPO_4$ )

| Area       | Detected, weight % |       |       |       |       | Phase |
|------------|--------------------|-------|-------|-------|-------|-------|
|            | K                  | Sc    | P     | Mo    | O     |       |
| SpectrumA1 | 15.01              | 17.34 | 11.96 | 18.52 | 37.17 | 1     |
| SpectrumA2 | 13.96              | 16.84 | 11.32 | 19.52 | 38.36 | 1     |
| SpectrumA3 | 15.64              | 17.76 | 10.32 | 16.77 | 39.51 | 1     |
| SpectrumA4 | 16.11              | 18.12 | 12.33 | 18.67 | 34.77 | 1     |
| SpectrumA5 | 15.08              | 17.77 | 12.04 | 18.85 | 36.26 | 1     |
| SpectrumA6 | 14.84              | 18.22 | 11.26 | 17.32 | 38.36 | 1     |
| SpectrumB1 | 15.11              | 18.72 | 11.94 | 17.96 | 36.27 | 1     |
| SpectrumB2 | 14.81              | 17.46 | 10.88 | 19.27 | 37.58 | 1     |
| SpectrumC1 | 14.84              | 16.92 | 10.54 | 17.21 | 40.49 | 1     |
| SpectrumC2 | 15.32              | 16.87 | 10.87 | 17.51 | 39.43 | 1     |
| SpectrumC3 | 13.96              | 18.14 | 10.54 | 18.77 | 38.59 | 1     |
| SpectrumC4 | 15.47              | 16.74 | 11.67 | 17.95 | 38.17 | 1     |
| SpectrumC5 | 15.34              | 16.34 | 12.34 | 19.32 | 36.66 | 1     |
| SpectrumD1 | 15.06              | 17.37 | 11.97 | 18.53 | 37.07 | 1     |
| SpectrumD2 | 0.43               | 32.24 | 21.76 | 0.72  | 44.85 | 2     |
| SpectrumD3 | 14.61              | 16.87 | 12.81 | 17.01 | 38.70 | 1     |
| SpectrumD4 | 15.42              | 16.92 | 12.14 | 16.21 | 39.31 | 1     |
| SpectrumD5 | 0.51               | 32.74 | 22.42 | 0.27  | 44.06 | 2     |
